# Supplementary material for: Helicobacter spp. in the Stomach of Cats: Successful Colonization and Absence of Relevant Histopathological Alterations Reveals High Adaptation to the Host Gastric Niche
Source: MDPI journal article supplement (doi:10.3390/vetsci9050228), 2022-05-10
Supplement: s1 [file s1]

**Table S1.** Primers sequences used for conventional PCR and thermo cycling conditions.

| <i>Helicobacter</i><br>species | Primer       | Nucleotide sequence                        | Target<br>gene | Amplicon<br>size (bp) | Thermal cycle conditions |              |      | Positive<br>control |
|--------------------------------|--------------|--------------------------------------------|----------------|-----------------------|--------------------------|--------------|------|---------------------|
|                                |              |                                            |                |                       | Nr.<br>Cycles            | Temp.<br>(C) | Time |                     |
| <i>Helicobacter</i> spp.       | Hcom1        | GTA AAG GCT CAC CAA GGC TAT                | 16S            | 389                   | 40                       | 94           | 1'   | *                   |
|                                | Hcom2        | CCA CCT ACC TCT CCC ACA CTC                | 16S            |                       |                          | 63           | 1'   |                     |
|                                |              |                                            |                |                       |                          | 72           | 1'   |                     |
| <i>H. pylori</i>               | BFHpyl_F1    | AAA GAG CGT GGT TTT CAT GGC G              | ureAB          | 217                   | 45                       | 94           | 30"  | 26695               |
|                                | BFHpyl_R1    | GGG TTT TAC CGC CAC CGA ATT TAA            | ureAB          |                       |                          | 59           | 30"  |                     |
|                                |              |                                            |                |                       |                          | 72           | 1'   |                     |
| <i>H. heilmannii</i>           | Hh-IceA-FWQ  | GGC TCT GCG TAG GAC CTG CTA CAG AAG CTC TC | ureAB          | 135                   | 30                       | 94           | 30"  | ASB1.4              |
|                                | Hh-IceA-RVQ  | GGC TGT AGG GAT TTG TTG AGG AGA AAT G      | ureAB          |                       |                          | 55           | 30"  |                     |
|                                |              |                                            |                |                       |                          | 72           | 30"  |                     |
| <i>H. felis</i>                | BFHfelis_F2  | GCT GGT GGC ATC GAT ACG CAT                | ureAB          | 154                   | 45                       | 94           | 30"  | CS1                 |
|                                | BFHfelis_R2  | TTT TTA GAT TAG CGC GTC CGG GA             | ureAB          |                       |                          | 60           | 30"  |                     |
|                                |              |                                            |                |                       |                          | 72           | 1'   |                     |
| <i>H. bizzozeronii</i>         | Hbizz_FQ_PAR | CGC TTT GAA CCC GGT GAG AAA A              | ure A          | 172                   | 45                       | 94           | 1'   | R1053               |
|                                | Hbizz_RQ_PAR | TAT CGC AAC CGC AAT TCA CAA CA             | ure A          |                       |                          | 58           | 1'   |                     |
|                                |              |                                            |                |                       |                          | 72           | 1'   |                     |
| <i>H. salomonis</i>            | Hsal_FQ_PAR  | CTC TTA TGA GTT GGA CTT GGT GCT CAC CAA T  | ure AB         | 91                    | 45                       | 94           | 30"  | R1051               |
|                                | Hsal_RQ_PAR  | TTT GCC ATC TTT AAT TCC AAT GTC GGC        | ure AB         |                       |                          | 61           | 30"  |                     |
|                                |              |                                            |                |                       |                          | 72           | 1'   |                     |
| <i>H. ailurogastricus</i>      | Ha-Lpsa-FWQ  | CTT GAG TAC GGC GAT GTC AAT                | Lpsa           | 136                   | 30                       | 94           | 30"  | ASB7.1              |
|                                | Ha-Lpsa-RVQ  | GGG GAA AAA TGT GCT TGA AGT                | Lpsa           |                       |                          | 55           | 30"  |                     |
|                                |              |                                            |                |                       |                          | 72           | 30"  |                     |

\* One of the *Helicobacter* species extracted from pure cultures was used as positive control.

**Table S2.** Table summarizing the histopathological alterations and colonization density observed in the feline stomach, according to the positive NHPH species-specific PCR results, final *Helicobacter* positive and negative results regardless of the method used.

| PCR positive results with specific species identification, regardless gastric location (n=28) |            |            |            |            |             |                   |                      |                         |                 |              |              |                           |              | Final positive<br>result regardless<br>the method used<br>% (nr/total)<br>(n=53)* | Final negative<br>result regardless<br>the method used<br>% (nr/total)<br>(n=18)* |
|-----------------------------------------------------------------------------------------------|------------|------------|------------|------------|-------------|-------------------|----------------------|-------------------------|-----------------|--------------|--------------|---------------------------|--------------|-----------------------------------------------------------------------------------|-----------------------------------------------------------------------------------|
|                                                                                               | <i>Hh</i>  | <i>Hf</i>  | <i>Hb</i>  | <i>Hs</i>  | <i>Hh-l</i> | <i>Hh+<br/>Hf</i> | <i>Hh+Hf+<br/>Hb</i> | <i>Hh+Hf+<br/>Hb+Hs</i> | <i>Hh+Hf+Hs</i> | <i>Hh+Hb</i> | <i>Hh+Hs</i> | <i>Hf+Hb+<br/>Hs+Hh-l</i> | <i>Hb+Hs</i> |                                                                                   |                                                                                   |
| <i>Histopathology grading</i> (Day <i>et al.</i> , 2008)                                      |            |            |            |            |             |                   |                      |                         |                 |              |              |                           |              |                                                                                   |                                                                                   |
| Normal                                                                                        | 3.6 (1/28) | 3.6 (1/28) | 0          | 3.6 (1/28) | 0           | 3.6 (1/28)        | 7.1 (2/28)           | 7.1 (2/28)              | 3.6 (1/28)      | 0            | 3.6 (1/28)   | 3.6 (1/28)                | 0            | 24.5 (13/53)                                                                      | 38.9 (7/18)                                                                       |
| Mild gastritis                                                                                | 3.6 (1/28) | 0          | 3.6 (1/28) | 0          | 3.6 (1/28)  | 3.6 (1/28)        | 0                    | 3.6 (1/28)              | 3.6 (1/28)      | 0            | 3.6 (1/28)   | 0                         | 3.6 (1/28)   | 22.6 (12/53)                                                                      | 44.4 (8/18)                                                                       |
| Moderate gastritis                                                                            | 0          | 0          | 0          | 0          | 0           | 3.6 (1/28)        | 3.6 (1/28)           | 0                       | 0               | 3.6 (1/28)   | 7.1 (2/28)   | 0                         | 0            | 35.9 (19/53)                                                                      | 11.1 (2/18)                                                                       |
| Marked gastritis                                                                              | 0          | 0          | 0          | 3.6 (1/28) | 0           | 0                 | 0                    | 0                       | 0               | 0            | 0            | 0                         | 0            | 9.4 (5/53)                                                                        | 0                                                                                 |
| ID                                                                                            | 3.6 (1/28) | 0          | 3.6 (1/28) | 0          | 0           | 0                 | 0                    | 0                       | 0               | 0            | 3.6 (1/28)   | 0                         | 0            | 7.6 (4/53)                                                                        | 5.6 (1/18)                                                                        |
| <i>Surface epithelial injury</i>                                                              |            |            |            |            |             |                   |                      |                         |                 |              |              |                           |              |                                                                                   |                                                                                   |
| 1 - Normal                                                                                    | 0          | 0          | 0          | 0          | 0           | 0                 | 0                    | 3.6 (1/28)              | 0               | 0            | 0            | 0                         | 0            | 5.7 (3/53)                                                                        | 5.6 (1/18)                                                                        |
| 2 - Mild                                                                                      | 7.1 (2/28) | 3.6 (1/28) | 3.6 (1/28) | 7.1 (2/28) | 3.6 (1/28)  | 7.1 (2/28)        | 7.1 (2/28)           | 7.1 (2/28)              | 3.6 (1/28)      | 3.6 (1/28)   | 10.7 (3/28)  | 0                         | 3.6 (1/28)   | 69.8 (37/53)                                                                      | 77.8 (14/18)                                                                      |
| 3 - Moderate                                                                                  | 0          | 0          | 0          | 0          | 0           | 3.6 (1/28)        | 0                    | 0                       | 3.6 (1/28)      | 0            | 3.6 (1/28)   | 0                         | 0            | 9.4 (5/53)                                                                        | 0                                                                                 |
| 4 - Marked                                                                                    | 0          | 0          | 0          | 0          | 0           | 0                 | 0                    | 0                       | 0               | 0            | 0            | 0                         | 0            | 3.8 (2/53)                                                                        | 5.6 (1/18)                                                                        |
| ID                                                                                            | 3.6 (1/28) | 0          | 3.6 (1/28) | 0          | 0           | 0                 | 3.6 (1/28)           | 0                       | 0               | 0            | 3.6 (1/28)   | 3.6 (1/28)                | 0            | 11.3 (6/53)                                                                       | 11.1 (2/18)                                                                       |
| <i>Gastric pit epithelial injury</i>                                                          |            |            |            |            |             |                   |                      |                         |                 |              |              |                           |              |                                                                                   |                                                                                   |
| 1 - Normal                                                                                    | 7.1 (2/28) | 3.6 (1/28) | 0          | 7.1 (2/28) | 3.6 (1/28)  | 0                 | 3.6 (1/28)           | 3.6 (1/28)              | 3.6 (1/28)      | 0            | 10.7 (3/28)  | 0                         | 3.6 (1/28)   | 37.7 (20/53)                                                                      | 50.0 (9/18)                                                                       |
| 2 - Mild                                                                                      | 0          | 0          | 3.6 (1/28) | 0          | 0           | 7.1 (2/28)        | 3.6 (1/28)           | 7.1 (2/28)              | 0               | 3.6 (1/28)   | 3.6 (1/28)   | 0                         | 0            | 37.7 (20/53)                                                                      | 27.8 (5/18)                                                                       |
| 3 - Moderate                                                                                  | 0          | 0          | 0          | 0          | 0           | 3.6 (1/28)        | 0                    | 0                       | 3.6 (1/28)      | 0            | 0            | 0                         | 0            | 11.3 (6/53)                                                                       | 5.6 (1/18)                                                                        |
| 4 - Marked                                                                                    | 0          | 0          | 0          | 0          | 0           | 0                 | 0                    | 0                       | 0               | 0            | 0            | 0                         | 0            | 1.9 (1/53)                                                                        | 5.6 (1/18)                                                                        |
| ID                                                                                            | 3.6 (1/28) | 0          | 3.6 (1/28) | 0          | 0           | 0                 | 3.6 (1/28)           | 0                       | 0               | 0            | 3.6 (1/28)   | 3.6 (1/28)                | 0            | 11.3 (6/53)                                                                       | 11.1 (2/18)                                                                       |

| <i>Fibrosis/ mucosal atrophy</i> |            |            |            |            |            |            |             |             |            |            |             |            |            |              |              |
|----------------------------------|------------|------------|------------|------------|------------|------------|-------------|-------------|------------|------------|-------------|------------|------------|--------------|--------------|
| 1 - Normal                       | 7.1 (2/28) | 3.6 (1/28) | 3.6 (1/28) | 7.1 (2/28) | 0          | 7.1 (2/28) | 10.7 (3/28) | 10.7 (3/28) | 7.1 (2/28) | 3.6 (1/28) | 14.3 (4/28) | 3.6 (1/28) | 3.6 (1/28) | 56.6 (30/53) | 72.2 (13/18) |
| 2 - Mild                         | 0          | 0          | 0          | 0          | 0          | 3.6 (1/28) | 0           | 0           | 0          | 0          | 0           | 0          | 0          | 17.0 (9/53)  | 16.7 (3/18)  |
| 3 - Moderate                     | 0          | 0          | 0          | 0          | 3.6 (1/28) | 0          | 0           | 0           | 0          | 0          | 0           | 0          | 0          | 18.9 (10/53) | 5.6 (1/18)   |
| 4 - Marked                       | 0          | 0          | 0          | 0          | 0          | 0          | 0           | 0           | 0          | 0          | 0           | 0          | 0          | 0            | 0            |
| ID                               | 3.6 (1/28) | 0          | 3.6 (1/28) | 0          | 0          | 0          | 0           | 0           | 0          | 0          | 3.6 (1/28)  | 0          | 0          | 7.5 (4/53)   | 5.6 (1/18)   |

| Intraepithelial lymphocytes |            |            |            |            |            |            |            |            |            |            |            |            |            |              |              |
|-----------------------------|------------|------------|------------|------------|------------|------------|------------|------------|------------|------------|------------|------------|------------|--------------|--------------|
| 1 - Normal                  | 7.1 (2/28) | 3.6 (1/28) | 0          | 3.6 (1/28) | 0          | 3.6 (1/28) | 0          | 3.6 (1/28) | 3.6 (1/28) | 0          | 3.6 (1/28) | 3.6 (1/28) | 0          | 37.7 (20/53) | 66.7 (12/18) |
| 2 - Mild                    | 0          | 0          | 0          | 0          | 0          | 0          | 3.6 (1/28) | 0          | 3.6 (1/28) | 3.6 (1/28) | 7.1 (2/28) | 0          | 3.6 (1/28) | 15.1 (8/53)  | 11.1 (2/18)  |
| 3 - Moderate                | 0          | 0          | 0          | 3.6 (1/28) | 0          | 3.6 (1/28) | 0          | 3.6 (1/28) | 0          | 0          | 3.6 (1/28) | 0          | 0          | 13.2 (7/53)  | 5.6 (1/18)   |
| 4 - Marked                  | 0          | 0          | 3.6 (1/28) | 0          | 0          | 0          | 3.6 (1/28) | 3.6 (1/28) | 0          | 0          | 0          | 0          | 0          | 20.8 (11/53) | 5.6 (1/18)   |
| ID                          | 3.6 (1/28) | 0          | 3.6 (1/28) | 0          | 3.6 (1/28) | 3.6 (1/28) | 3.6 (1/28) | 0          | 0          | 0          | 3.6 (1/28) | 0          | 0          | 13.2 (7/53)  | 11.1 (2/18)  |

| <i>Lamina propria lymphocytes and plasma cells</i> |            |            |            |            |            |            |            |            |            |            |            |            |            |              |             |
|----------------------------------------------------|------------|------------|------------|------------|------------|------------|------------|------------|------------|------------|------------|------------|------------|--------------|-------------|
| 1 - Normal                                         | 3.6 (1/28) | 3.6 (1/28) | 0          | 3.6 (1/28) | 0          | 3.6 (1/28) | 7.1 (2/28) | 7.1 (2/28) | 3.6 (1/28) | 0          | 3.6 (1/28) | 3.6 (1/28) | 0          | 24.5 (13/53) | 38.9 (7/18) |
| 2 - Mild                                           | 3.6 (1/28) | 0          | 3.6 (1/28) | 0          | 3.6 (1/28) | 3.6 (1/28) | 0          | 3.6 (1/28) | 3.6 (1/28) | 0          | 3.6 (1/28) | 0          | 3.6 (1/28) | 22.6 (12/53) | 44.4 (8/18) |
| 3 - Moderate                                       | 0          | 0          | 0          | 0          | 0          | 3.6 (1/28) | 3.6 (1/28) | 0          | 0          | 3.6 (1/28) | 7.1 (2/28) | 0          | 0          | 35.8 (19/53) | 11.1 (2/18) |
| 4 - Marked                                         | 0          | 0          | 0          | 3.6 (1/28) | 0          | 0          | 0          | 0          | 0          | 0          | 0          | 0          | 0          | 9.4 (5/53)   | 0           |
| ID                                                 | 3.6 (1/28) | 0          | 3.6 (1/28) | 0          | 0          | 0          | 0          | 0          | 0          | 0          | 3.6 (1/28) | 0          | 0          | 7.5 (4/53)   | 5.6 (1/18)  |

| <i>Lamina propria eosinophils</i> |            |            |            |            |            |             |             |             |            |            |             |            |            |              |              |
|-----------------------------------|------------|------------|------------|------------|------------|-------------|-------------|-------------|------------|------------|-------------|------------|------------|--------------|--------------|
| 1 - Normal                        | 7.1 (2/28) | 3.6 (1/28) | 3.6 (1/28) | 7.1 (2/28) | 3.6 (1/28) | 10.7 (3/28) | 10.7 (3/28) | 10.7 (3/28) | 7.1 (2/28) | 3.6 (1/28) | 14.3 (4/28) | 3.6 (1/28) | 3.6 (1/28) | 81.1 (43/53) | 88.9 (16/18) |
| 2 - Mild                          | 0          | 0          | 0          | 0          | 0          | 0           | 0           | 0           | 0          | 0          | 0           | 0          | 0          | 5.7 (3/53)   | 5.6 (1/18)   |
| 3 - Moderate                      | 0          | 0          | 0          | 0          | 0          | 0           | 0           | 0           | 0          | 0          | 0           | 0          | 0          | 3.8 (2/53)   | 0            |
| 4 - Marked                        | 0          | 0          | 0          | 0          | 0          | 0           | 0           | 0           | 0          | 0          | 0           | 0          | 0          | 1.9 (1/53)   | 0            |
| ID                                | 3.6 (1/28) | 0          | 3.6 (1/28) | 0          | 0          | 0           | 0           | 0           | 0          | 0          | 3.6 (1/28)  | 0          | 0          | 7.5 (4/53)   | 5.6 (1/18)   |

*Lamina própria neutrophils*

|              |            |            |            |            |            |             |             |             |            |            |             |            |            |              |              |
|--------------|------------|------------|------------|------------|------------|-------------|-------------|-------------|------------|------------|-------------|------------|------------|--------------|--------------|
| 1 - Normal   | 7.1 (2/28) | 3.6 (1/28) | 3.6 (1/28) | 7.1 (2/28) | 3.6 (1/28) | 10.7 (3/28) | 10.7 (3/28) | 10.7 (3/28) | 7.1 (2/28) | 3.6 (1/28) | 14.3 (4/28) | 3.6 (1/28) | 3.6 (1/28) | 81.1 (43/53) | 83.3 (15/18) |
| 2 - Mild     | 0          | 0          | 0          | 0          | 0          | 0           | 0           | 0           | 0          | 0          | 0           | 0          | 0          | 7.5 (4/53)   | 5.6 (1/18)   |
| 3 - Moderate | 0          | 0          | 0          | 0          | 0          | 0           | 0           | 0           | 0          | 0          | 0           | 0          | 0          | 1.9 (1/53)   | 5.6 (1/18)   |
| 4 - Marked   | 0          | 0          | 0          | 0          | 0          | 0           | 0           | 0           | 0          | 0          | 0           | 0          | 0          | 1.9 (1/53)   | 0            |
| ID           | 3.6 (1/28) | 0          | 3.6 (1/28) | 0          | 0          | 0           | 0           | 0           | 0          | 0          | 3.6 (1/28)  | 0          | 0          | 7.5 (4/53)   | 5.6 (1/18)   |

*Other inflammatory cells*

|             |            |            |            |            |            |             |             |             |            |            |             |            |            |              |              |
|-------------|------------|------------|------------|------------|------------|-------------|-------------|-------------|------------|------------|-------------|------------|------------|--------------|--------------|
| 1 - Normal  | 7.1 (2/28) | 3.6 (1/28) | 3.6 (1/28) | 7.1 (2/28) | 3.6 (1/28) | 10.7 (3/28) | 10.7 (3/28) | 10.7 (3/28) | 7.1 (2/28) | 3.6 (1/28) | 14.3 (4/28) | 3.6 (1/28) | 3.6 (1/28) | 86.8 (46/53) | 83.3 (15/18) |
| 2 - Mild    | 0          | 0          | 0          | 0          | 0          | 0           | 0           | 0           | 0          | 0          | 0           | 0          | 0          | 5.7 (3/53)   | 11.1 (2/18)  |
| 3- Moderate | 0          | 0          | 0          | 0          | 0          | 0           | 0           | 0           | 0          | 0          | 0           | 0          | 0          | 0            | 0            |
| 4 - Marked  | 0          | 0          | 0          | 0          | 0          | 0           | 0           | 0           | 0          | 0          | 0           | 0          | 0          | 0            | 0            |
| ID          | 3.6 (1/28) | 0          | 3.6 (1/28) | 0          | 0          | 0           | 0           | 0           | 0          | 0          | 3.6 (1/28)  | 0          | 0          | 7.5 (4/53)   | 5.6 (1/18)   |

*Lymphofollicular hyperplasia*

|              |            |            |            |            |            |             |             |             |            |            |             |            |            |              |              |
|--------------|------------|------------|------------|------------|------------|-------------|-------------|-------------|------------|------------|-------------|------------|------------|--------------|--------------|
| 1 - Normal   | 7.1 (2/28) | 3.6 (1/28) | 3.6 (1/28) | 7.1 (2/28) | 3.6 (1/28) | 10.7 (3/28) | 10.7 (3/28) | 10.7 (3/28) | 7.1 (2/28) | 3.6 (1/28) | 14.3 (4/28) | 3.6 (1/28) | 3.6 (1/28) | 84.9 (45/53) | 83.3 (15/18) |
| 2 - Mild     | 0          | 0          | 0          | 0          | 0          | 0           | 0           | 0           | 0          | 0          | 0           | 0          | 0          | 3.8 (2/53)   | 0            |
| 3 - Moderate | 0          | 0          | 0          | 0          | 0          | 0           | 0           | 0           | 0          | 0          | 0           | 0          | 0          | 3.8 (2/53)   | 5.6 (1/18)   |
| 4 - Marked   | 0          | 0          | 0          | 0          | 0          | 0           | 0           | 0           | 0          | 0          | 0           | 0          | 0          | 0            | 5.6 (1/18)   |
| ID           | 3.6 (1/28) | 0          | 3.6 (1/28) | 0          | 0          | 0           | 0           | 0           | 0          | 0          | 3.6 (1/28)  | 0          | 0          | 7.5 (4/53)   | 5.6 (1/18)   |

*Bacterial density (based on IHC results)*

|     |            |            |            |            |            |            |            |             |            |            |             |            |            |              |    |
|-----|------------|------------|------------|------------|------------|------------|------------|-------------|------------|------------|-------------|------------|------------|--------------|----|
| 0   | 0          | 3.6 (1/28) | 0          | 0          | 0          | 0          | 0          | 0           | 0          | 0          | 0           | 0          | 0          | 7.5 (4/53)   | NA |
| +   | 0          | 0          | 0          | 0          | 3.6 (1/28) | 0          | 0          | 0           | 0          | 0          | 0           | 0          | 0          | 3.8 (2/53)   |    |
| ++  | 3.6 (1/28) | 0          | 0          | 0          | 0          | 7.1 (2/28) | 3.6 (1/28) | 0           | 0          | 0          | 0           | 0          | 0          | 11.3 (6/53)  |    |
| +++ | 3.6 (1/28) | 0          | 3.6 (1/28) | 7.1 (2/28) | 0          | 3.6 (1/28) | 7.1 (2/28) | 10.7 (3/28) | 7.1 (2/28) | 3.6 (1/28) | 14.3 (4/28) | 3.6 (1/28) | 3.6 (1/28) | 69.8 (37/53) |    |
| ID  | 3.6 (1/28) | 0          | 3.6 (1/28) | 0          | 0          | 0          | 0          | 0           | 0          | 0          | 3.6 (1/28)  | 0          | 0          | 7.5 (4/53)   |    |

Legend: Hh, *H. heilmannii*; Hf, *H. felis*; Hb, *H. bizzozeronii*; Hs, *H. salomonis*; Hh-l, *H. heilmannii*-like. ID, Indeterminate; NA, not applicable.

\* It was not possible to evaluate histologically 5 out of 71 animals due to the small amount of material present
